# Supplementary material for: Hyperoxia exposure upregulates Dvl-1 and activates Wnt/β-catenin signaling pathway in newborn rat lung
Source: Springer Nature journal article supplement (doi:10.1186/s12860-023-00465-6), 2023-02-02
Supplement: MOESM1 [file 12860_2023_465_MOESM1_ESM.pdf]

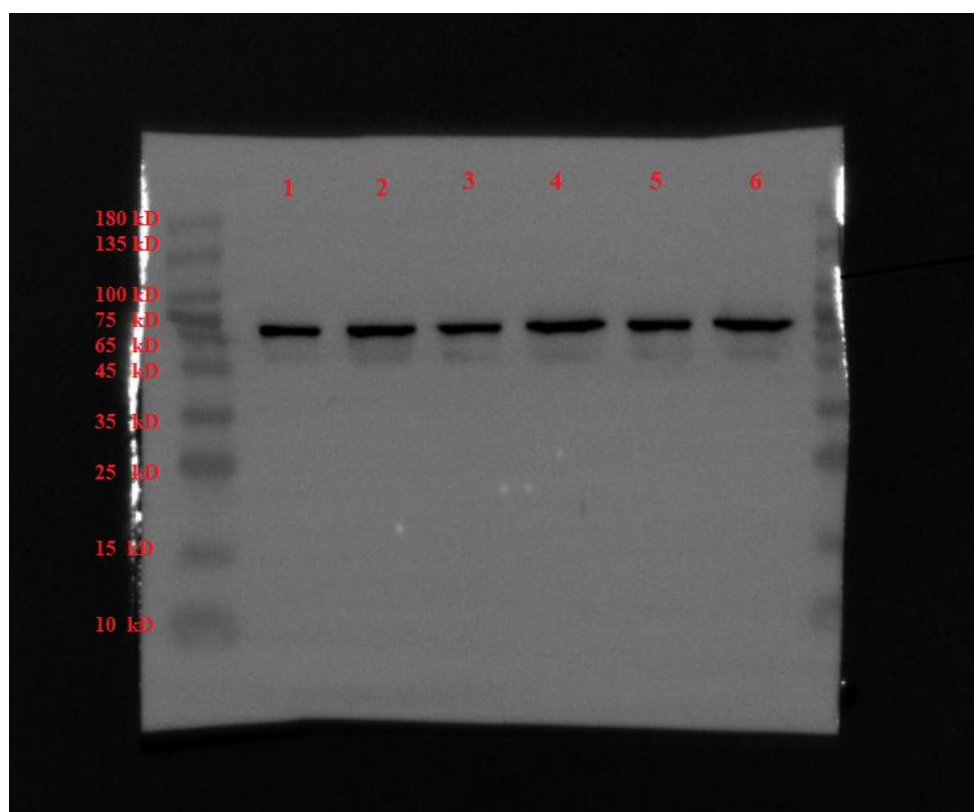

CTNNBL1-uncropped-replicate-1

**1:** normoxia exposure on 3rd day, **2:** hyporoxia exposure on 3rd day, **3:** normoxia exposure on 7th day, **4:** hyporoxia exposure on 7th day, **5:** normoxia exposure on 14th day, **6:** hyporoxia exposure on 14th day.

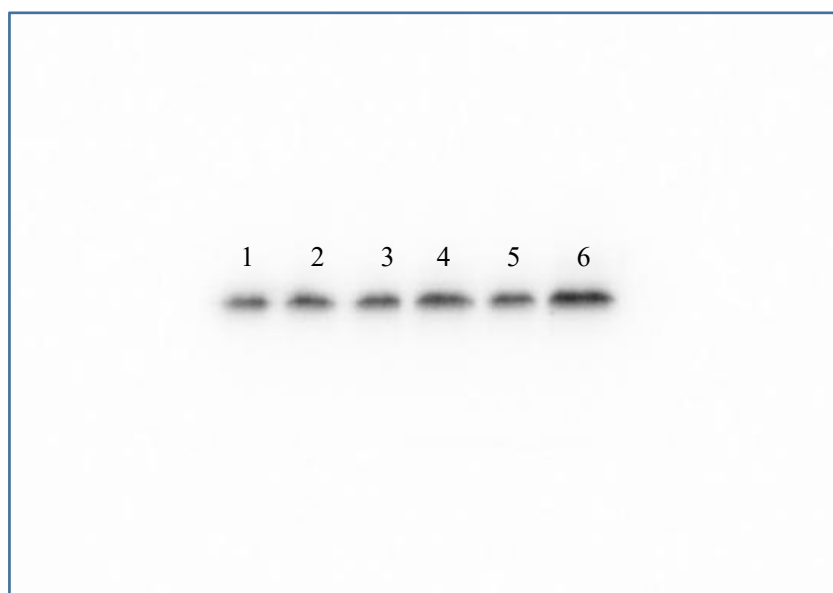

CTNNBL1 replicate-2

**1:** normoxia exposure on 3rd day, **2:** hyporoxia exposure on 3rd day, **3:** normoxia exposure on 7th day, **4:** hyporoxia exposure on 7th day, **5:** normoxia exposure on 14th day, **6:** hyporoxia exposure on 14th day.

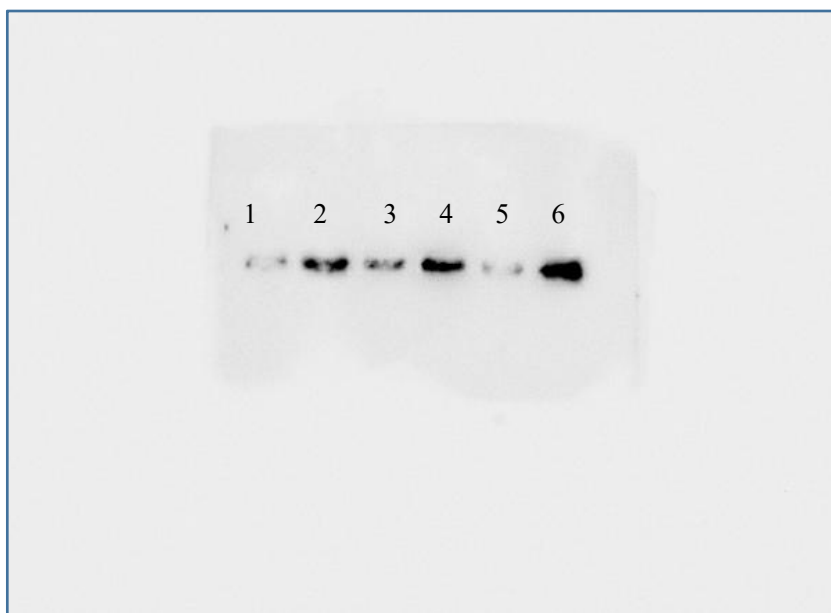

CTNNB1 replicate-3

**1:** normoxia exposure on 3rd day, **2:** hypoxia exposure on 3rd day, **3:** normoxia exposure on 7th day, **4:** hypoxia exposure on 7th day, **5:** normoxia exposure on 14th day, **6:** hypoxia exposure on 14th day.

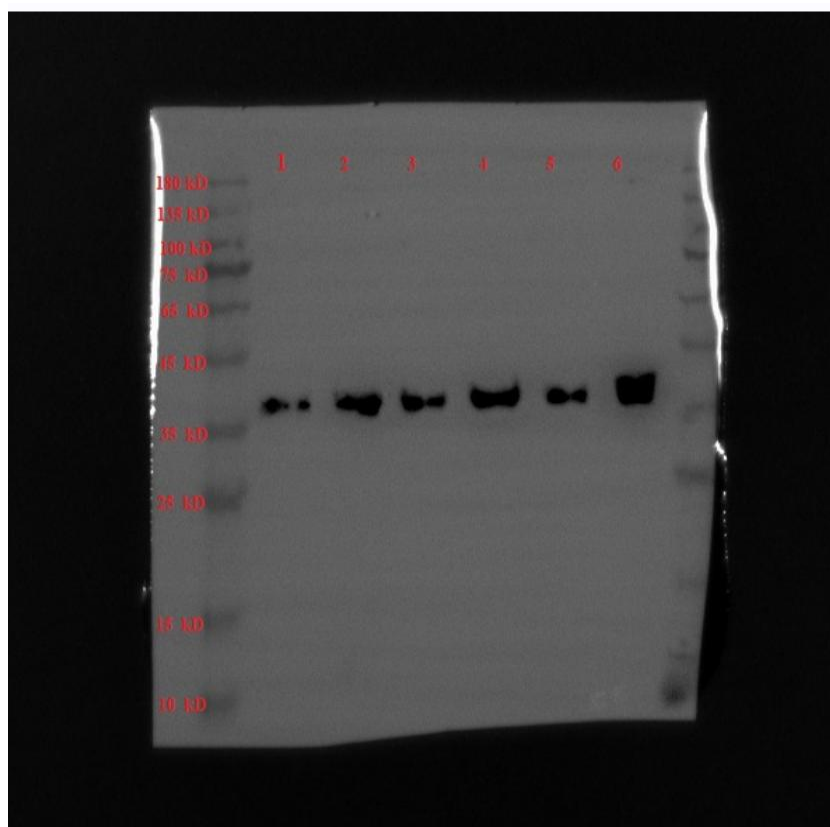

CYCLIND1-uncropped-replicate-1

**1:** normoxia exposure on 3rd day, **2:** hypoxia exposure on 3rd day, **3:** normoxia exposure on 7th day, **4:** hypoxia exposure on 7th day, **5:** normoxia exposure on 14th day, **6:** hypoxia exposure on 14th day.

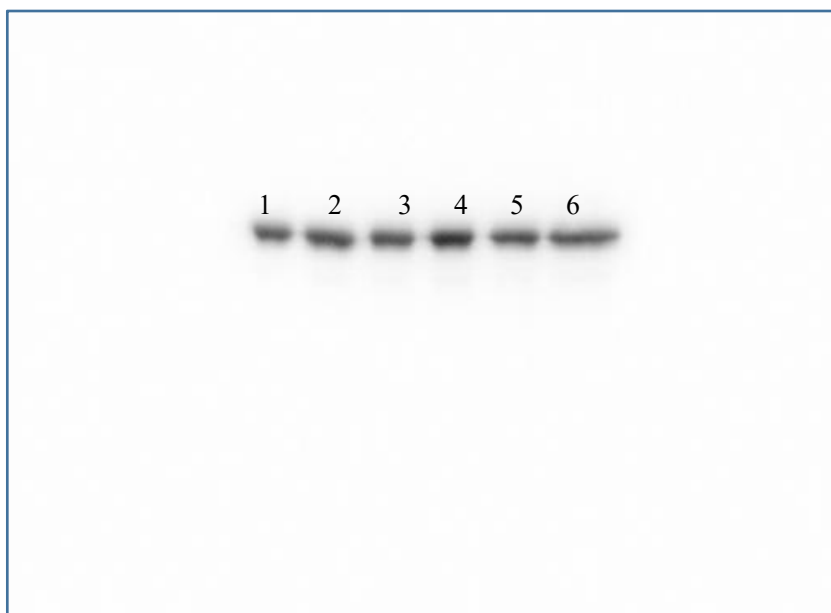

**CYCLIND1-replicate-2**

**1:** normoxia exposure on 3rd day, **2:** hyporoxia exposure on 3rd day, **3:** normoxia exposure on 7th day, **4:** hyporoxia exposure on 7th day, **5:** normoxia exposure on 14th day, **6:** hyporoxia exposure on 14th day.

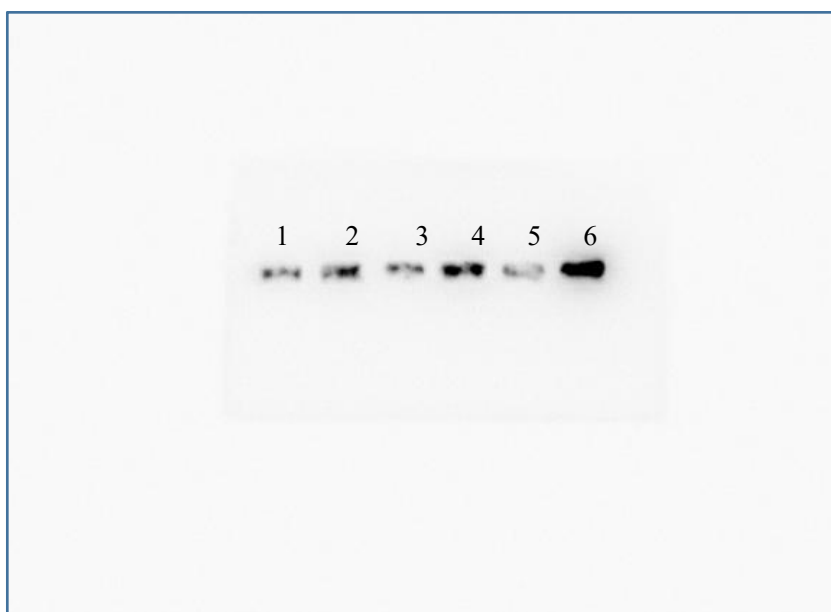

**CYCLIND1-replicate-3**

**1:** normoxia exposure on 3rd day, **2:** hyporoxia exposure on 3rd day, **3:** normoxia exposure on 7th day, **4:** hyporoxia exposure on 7th day, **5:** normoxia exposure on 14th day, **6:** hyporoxia exposure on 14th day.

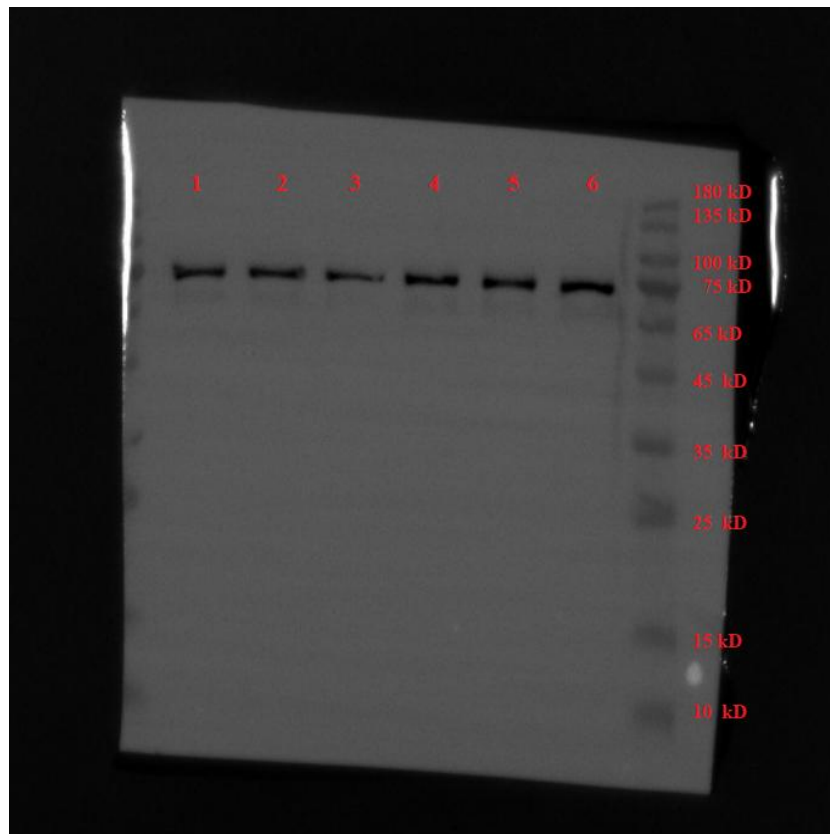

DVL-1-uncropped-replicate-1

**1:** normoxia exposure on 3rd day, **2:** hypoxia exposure on 3rd day, **3:** normoxia exposure on 7th day, **4:** hypoxia exposure on 7th day, **5:** normoxia exposure on 14th day, **6:** hypoxia exposure on 14th day.

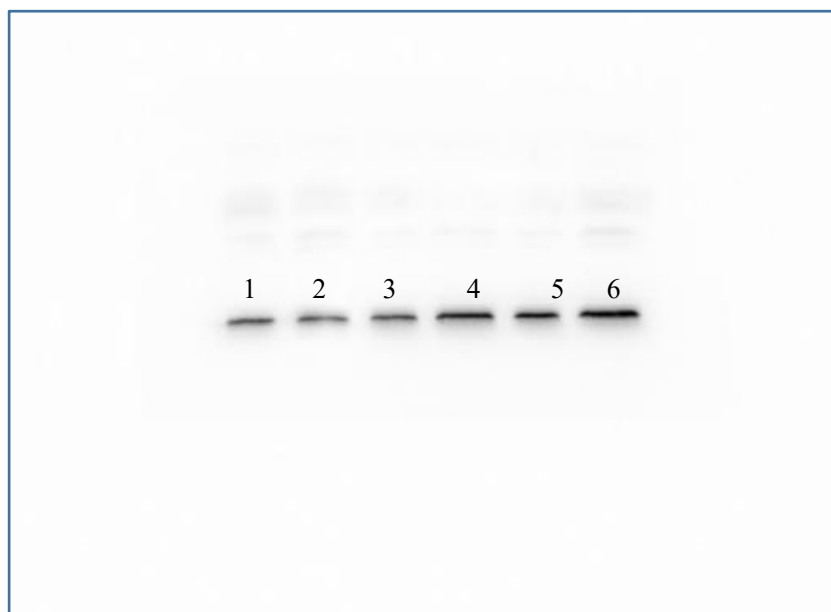

DVL-1 replicate-2

**1:** normoxia exposure on 3rd day, **2:** hypoxia exposure on 3rd day, **3:** normoxia exposure on 7th day, **4:** hypoxia exposure on 7th day, **5:** normoxia exposure on 14th day, **6:** hypoxia exposure on 14th day.

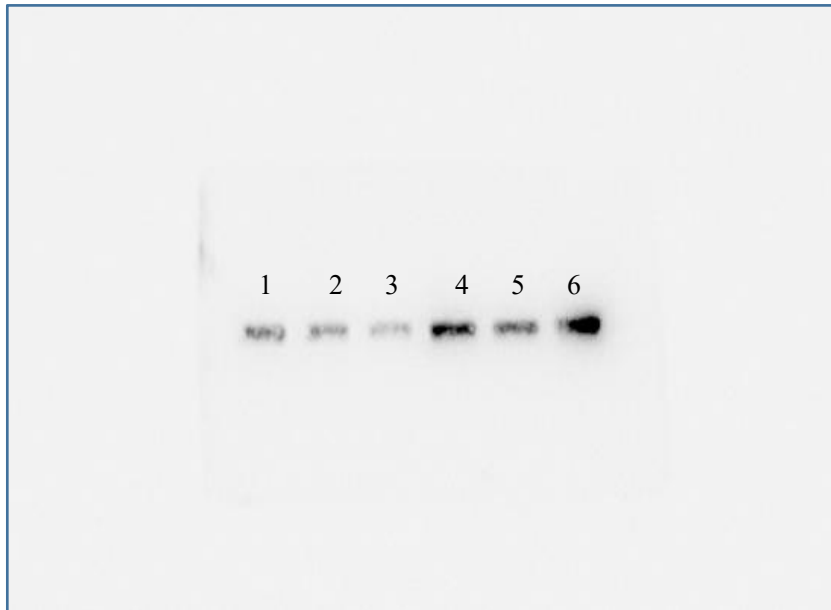

DVL-1 replicate-3

**1:** normoxia exposure on 3rd day, **2:** hypoxia exposure on 3rd day, **3:** normoxia exposure on 7th day, **4:** hypoxia exposure on 7th day, **5:** normoxia exposure on 14th day, **6:** hypoxia exposure on 14th day.

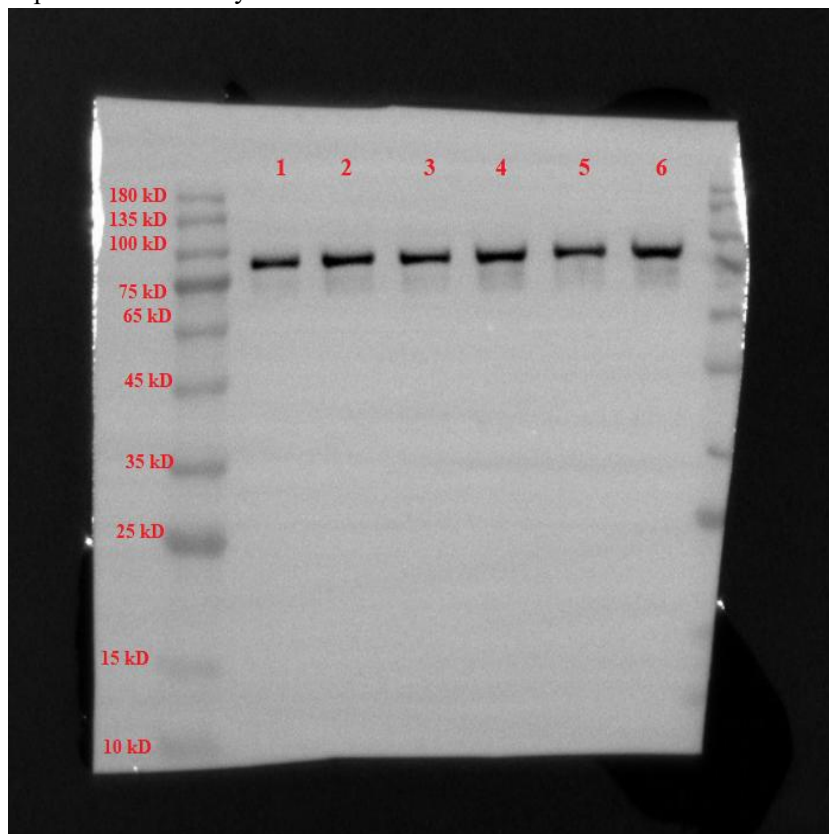

$\beta$ -CATENIN-uncropped-replicate-1

**1:** normoxia exposure on 3rd day, **2:** hypoxia exposure on 3rd day, **3:** normoxia exposure on 7th day, **4:** hypoxia exposure on 7th day, **5:** normoxia exposure on 14th day, **6:** hypoxia exposure on 14th day.

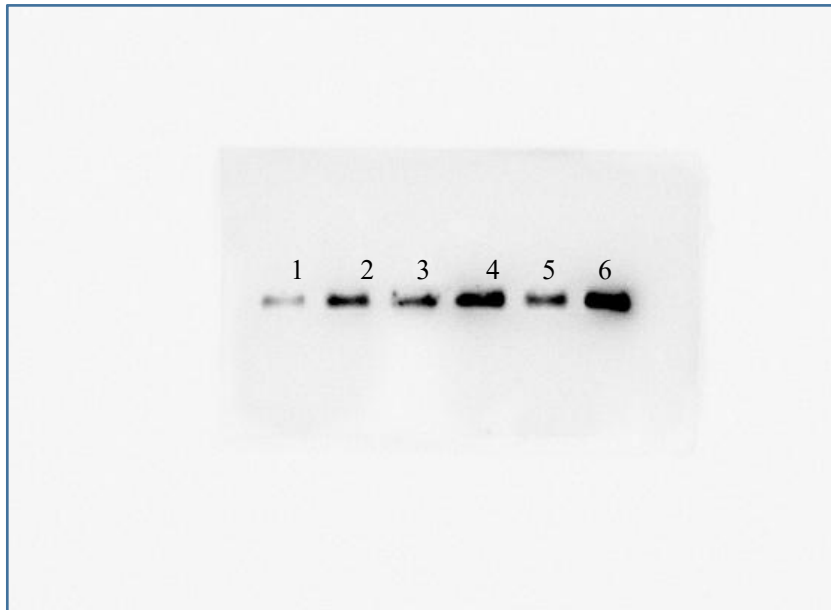

β-CATENIN-replicate-2

**1:** normoxia exposure on 3rd day, **2:** hypoxia exposure on 3rd day, **3:** normoxia exposure on 7th day, **4:** hypoxia exposure on 7th day, **5:** normoxia exposure on 14th day, **6:** hypoxia exposure on 14th day.

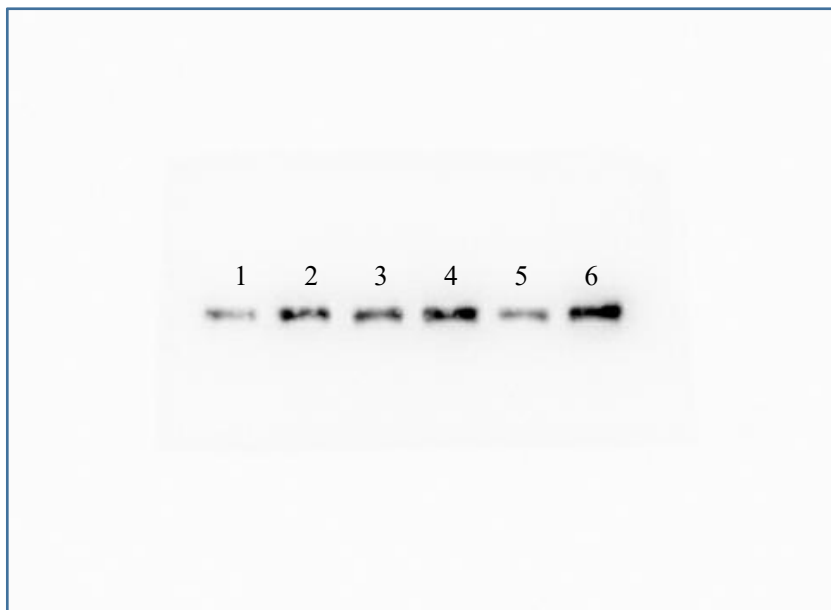

β-CATENIN-replicate-3

**1:** normoxia exposure on 3rd day, **2:** hypoxia exposure on 3rd day, **3:** normoxia exposure on 7th day, **4:** hypoxia exposure on 7th day, **5:** normoxia exposure on 14th day, **6:** hypoxia exposure on 14th day.

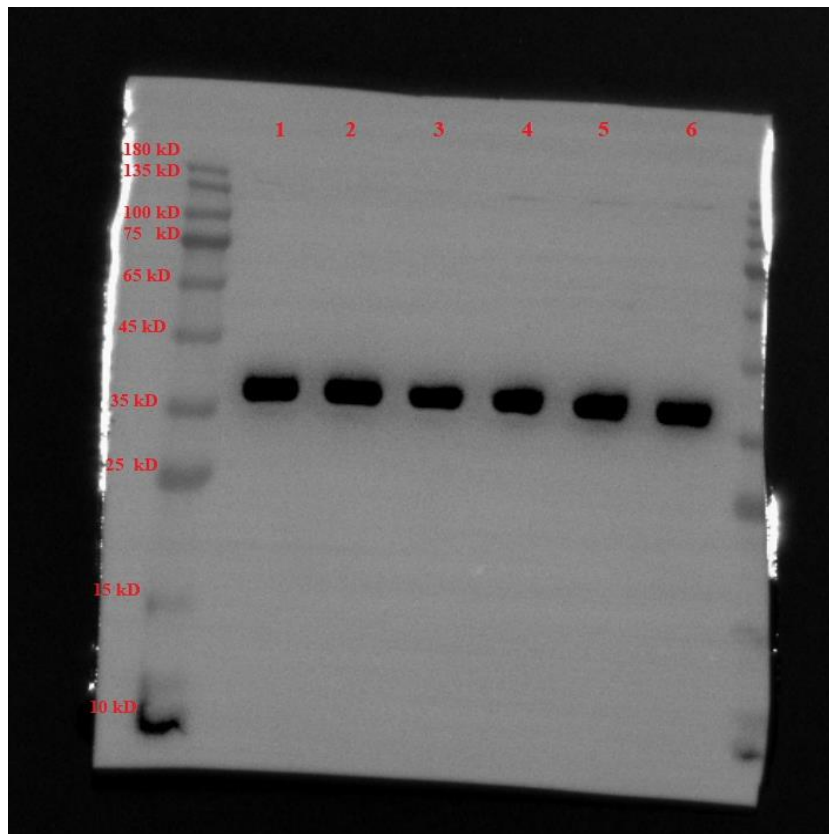

GAPDH-uncropped-replicate-1

**1:** normoxia exposure on 3rd day, **2:** hypoxia exposure on 3rd day, **3:** normoxia exposure on 7th day, **4:** hypoxia exposure on 7th day, **5:** normoxia exposure on 14th day, **6:** hypoxia exposure on 14th day.

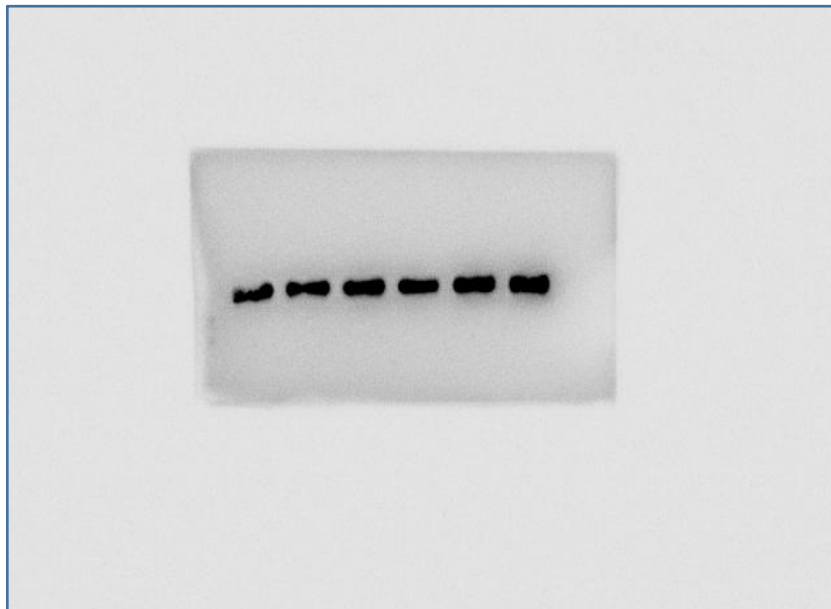

GAPDH-replicate-2

**1:** normoxia exposure on 3rd day, **2:** hypoxia exposure on 3rd day, **3:** normoxia exposure on 7th day, **4:** hypoxia exposure on 7th day, **5:** normoxia exposure on 14th day, **6:** hypoxia exposure on 14th day.

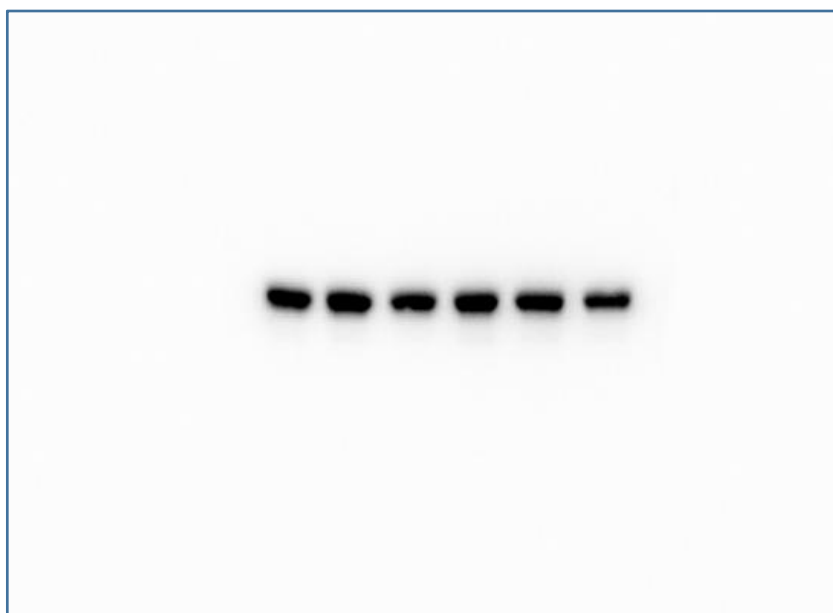

GAPDH-replicate-3

**1:** normoxia exposure on 3rd day, **2:** hyporoxia exposure on 3rd day, **3:** normoxia exposure on 7th day, **4:** hyporoxia exposure on 7th day, **5:** normoxia exposure on 14th day, **6:** hyporoxia exposure on 14th day.
